# Supplementary material
Source: Research Square preprint supplement (doi:10.21203/rs.3.rs-9535071/v1)
Supplement: Supplementary file 1 [file 927b5e065e2f965cee0b472f.docx]

**TABLES/FIGURES**

**Figure 1.** Study Flowchart


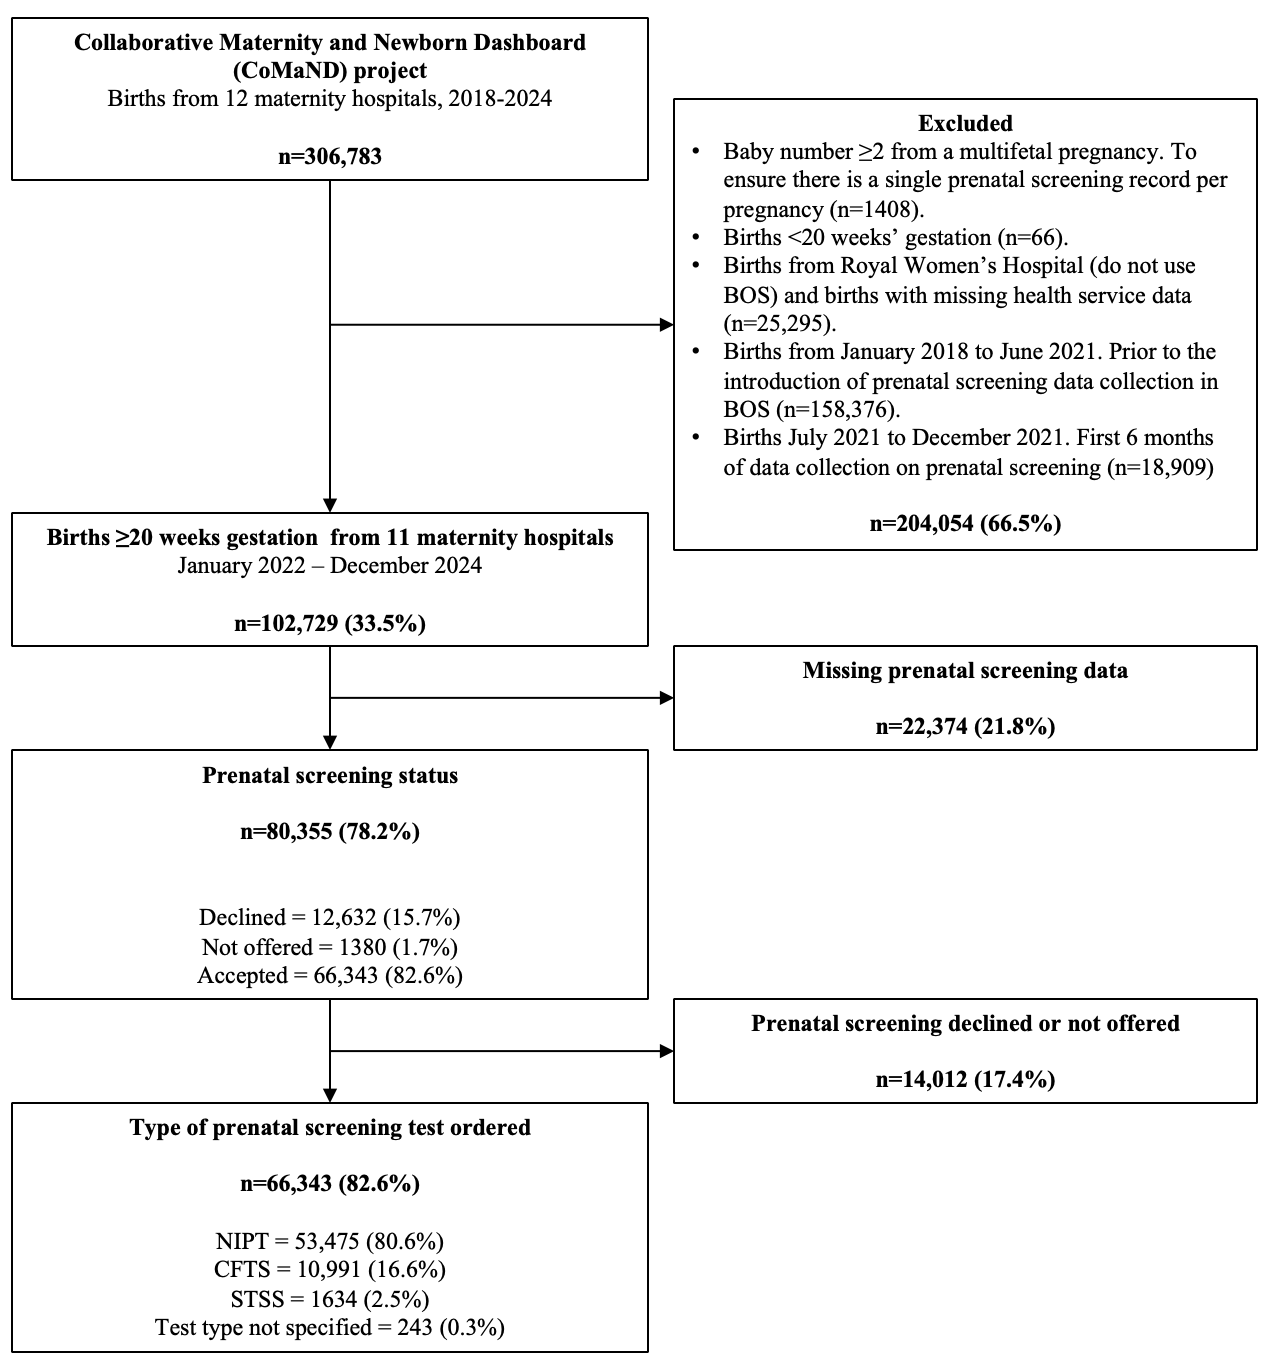


CFTS, combined first trimester screening; BOS, birthing outcome system™️; STSS, second trimester serum screening; NIPT, non-invasive prenatal testing.

**Table 1.** Maternal sociodemographic and clinical characteristics associated with prenatal aneuploidy screening status.

| **Characteristic** | **Declined screening** | | **Not offered screening** | | **Accepted screening** | | **aRRR (95% CI)** | | | |
| --- | --- | --- | --- | --- | --- | --- | --- | --- | --- | --- |
|  | **n** | **(row %)** | **n** | **(row %)** | **n** | **(row %)** | **Declined  vs. accepted** | | **Not offered vs. accepted** | |
| All participants | 12632 | (15.7) | 1380 | (1.7) | 66343 | (82.6) |  |  |  |  |
| **Maternal age (years)** |  |  |  |  |  |  |  |  |  |  |
| < 25 | 2588 | (31.5) | 344 | (4.2) | 5277 | (64.3) | 3.86 | (3.75-3.96) | 4.30 | (4.06-4.56) |
| 25-29 | 3209 | (19.6) | 324 | (2.0) | 12850 | (78.4) | 1.83 | (1.79-1.87) | 1.74 | (1.66-1.84) |
| 30-34 | 4045 | (13.0) | 395 | (1.3) | 26669 | (85.7) | Ref |  | Ref |  |
| 35-39 | 2033 | (11.0) | 227 | (1.2) | 16216 | (87.8) | 0.66 | (0.64-0.68) | 0.78 | (0.73-0.82) |
| ≥ 40 | 476 | (11.9) | 65 | (1.6) | 3462 | (86.5) | 0.51 | (0.48-0.53) | 0.77 | (0.70-0.84) |
| Missing | 281 | (12.9) | 25 | (1.2) | 1869 | (85.9) |  |  |  |  |
| **BMI categories** |  |  |  |  |  |  |  |  |  |  |
| <18 | 154 | (18.9) | 16 | (2.0) | 644 | (79.1) | 1.11 | (1.02-1.20) | 1.20 | (1.01-1.44) |
| 18-24 | 4463 | (12.9) | 408 | (1.2) | 29801 | (86.0) | Ref |  | Ref |  |
| 25-29 | 3671 | (15.3) | 425 | (1.8) | 19969 | (83.0) | 1.06 | (1.03-1.07) | 1.47 | (1.40-1.54) |
| 30-34 | 2123 | (18.8) | 230 | (2.0) | 8957 | (79.2) | 1.17 | (1.15-1.20) | 1.60 | (1.51-1.69) |
| 35-39 | 1077 | (12.4) | 120 | (2.4) | 3841 | (76.2) | 1.26 | (1.22-1.30) | 1.77 | (1.65-1.91) |
| ≥ 40 | 926 | (28.5) | 87 | (2.7) | 2237 | (68.8) | 1.62 | (1.55-1.68) | 2.17 | (1.99-2.36) |
| Missing | 218 | (18.1) | 94 | (7.8) | 894 | (74.1) |  |  |  |  |
| **Mothers' region of birth** |  |  |  |  |  |  |  |  |  |  |
| Americas | 110 | (12.2) | 14 | (1.6) | 780 | (86.3) | 1.53 | (1.41-1.66) | 2.36 | (1.97-2.83) |
| Australia | 5360 | (13.3) | 545 | (1.4) | 34472 | (85.4) | Ref |  | Ref |  |
| North Africa and the Middle East | 948 | (32.1) | 79 | (2.7) | 1927 | (65.2) | 1.94 | (1.87-2.01) | 1.96 | (1.80-2.14) |
| New Zealand | 868 | (41.8) | 94 | (4.5) | 1117 | (53.7) | 2.96 | (2.82-3.10) | 3.24 | (2.97-3.53) |
| North-East Asia | 100 | (4.0) | 22 | (0.9) | 2368 | (95.1) | 0.58 | (0.53-0.63) | 1.54 | (1.33-1.80) |
| North-West Europe | 135 | (7.5) | 11 | (0.6) | 1663 | (91.9) | 0.86 | (0.80-0.92) | 0.79 | (0.65-0.97) |
| Oceania§ | 389 | (50.9) | 47 | (6.1) | 328 | (42.9) | 3.14 | (2.93-3.36) | 3.60 | (3.19-4.06) |
| South-East Asia | 1056 | (15.5) | 128 | (1.9) | 5633 | (82.6) | 1.50 | (1.45-1.55) | 2.21 | (2.04-2.38) |
| Southern and Central Asia | 2419 | (14.0) | 300 | (1.7) | 14514 | (84.2) | 1.23 | (1.19-1.25) | 1.85 | (1.76-1.97) |
| Southern and Eastern Europe | 132 | (10.3) | 13 | (1.0) | 1136 | (88.7) | 0.70 | (0.65-0.75) | 0.76 | (0.62-0.93) |
| Sub-Saharan Africa | 904 | (40.9) | 83 | (3.8) | 1221 | (55.3) | 3.63 | (3.48-3.80) | 3.97 | (3.63-4.35) |
| Missing | 852 | (14.7) | 173 | (3.1) | 4414 | (82.3) |  |  |  |  |
| **Socioeconomic status (IRSAD quintile)** |  |  |  |  |  |  |  |  |  |  |
| 1 (most disadvantaged) | 4044 | (23.3) | 443 | (2.6) | 12870 | (74.2) | Ref |  | Ref |  |
| 2 | 1672 | (16.8) | 204 | (2.1) | 8076 | (81.2) | 0.76 | (0.74-0.78) | 0.88 | (0.78-0.89) |
| 3 | 4090 | (17.4) | 421 | (1.8) | 18936 | (80.8) | 0.77 | (0.75-0.78) | 0.72 | (0.68-0.76) |
| 4 | 1933 | (10.3) | 208 | (1.1) | 16703 | (88.6) | 0.59 | (0.57-0.60) | 0.56 | (0.52-0.60) |
| 5 (most advantaged) | 883 | (8.3) | 99 | (0.9) | 9720 | (90.8) | 0.59 | (0.57-0.61) | 0.56 | (0.51-0.61) |
| Missing | 10 | (18.9) | 5 | (9.4) | 38 | (71.7) |  |  |  |  |
| **Smoking status during pregnancy** |  |  |  |  |  |  |  |  |  |  |
| No | 11905 | (15.2) | 1257 | (1.6) | 64931 | (83.2) | Ref |  | Ref |  |
| Yes | 727 | (32.1) | 123 | (5.4) | 1412 | (62.4) | 1.22 | (1.18-1.27) | 1.86 | (1.72-2.00) |
| **COVID 19 status** |  |  |  |  |  |  |  |  |  |  |
| Unvaccinated | 2008 | (21.3) | 231 | (2.5) | 7171 | (76.2) | Ref |  | Ref |  |
| Vaccinated | 8266 | (14.3) | 990 | (1.5) | 54364 | (84.1) | 0.81 | (0.79-0.82) | 0.76 | (0.72-0.80) |
| Missing | 1358 | (21.5) | 159 | (2.5) | 4808 | (76.0) |  |  |  |  |
| **Pertussis status** |  |  |  |  |  |  |  |  |  |  |
| Unvaccinated | 2153 | (34.4) | 288 | (4.6) | 3816 | (61.0) | Ref |  | Ref |  |
| Vaccinated | 9556 | (13.4) | 1030 | (1.4) | 60971 | (85.2) | 0.58 | (0.56-0.59) | 0.54 | (0.51-0.58) |
| Missing | 923 | (36.3) | 62 | (2.4) | 1556 | (61.2) |  |  |  |  |
| **Parity**‡ |  |  |  |  |  |  |  |  |  |  |
| 0 | 3618 | (10.4) | 532 | (1.5) | 30545 | (88.0) | Ref |  | Ref |  |
| 1 | 4015 | (13.5) | 423 | (1.4) | 25297 | (85.1) | 1.68 | (1.64-1.71) | 1.17 | (1.11-1.23) |
| 2 | 2593 | (24.5) | 195 | (1.8) | 7788 | (73.6) | 3.43 | (3.34-3.52) | 1.56 | (1.46-1.65) |
| ≥ 3 | 2406 | (45.0) | 230 | (4.3) | 2713 | (50.7) | 7.17 | (6.94-7.39) | 3.93 | (3.68-4.19) |
| **Gestation at first antenatal visit** |  |  |  |  |  |  |  |  |  |  |
| ≤ 12 weeks | 9489 | (15.2) | 744 | (1.2) | 52011 | (83.6) | Ref |  | Ref |  |
| > 12 weeks | 3143 | (17.4) | 636 | (3.5) | 14332 | (79.1) | 1.01 | (0.99-1.03) | 2.18 | (2.09-2.28) |
| **Care model** |  |  |  |  |  |  |  |  |  |  |
| Private in public hospital | 92 | (6.0) | 20 | (1.3) | 1410 | (92.6) | 0.49 | (0.46-0.53) | 0.65 | (0.57-0.76) |
| All other care models | 12439 | (15.9) | 1334 | (1.7) | 64597 | (82.4) | Ref |  | Ref |  |
| Missing | 101 | (21.8) | 26 | (5.6) | 336 | (72.6) |  |  |  |  |

aRRR, adjusted relative risk ratio; BMI, body mass index (kg/m2); CI, confidence interval; IRSAD, Index of Relative Socioeconomic Advantage and Disadvantage.

‡Parity refers to the number of previous pregnancies resulting in a live birth or stillbirth at ≥ 20 weeks' gestation or with a birthweight of ≥ 400 g.

§Oceania excludes women born in Australia or New Zealand.

Row percentages are presented to reflect the distribution of prenatal screening type within each clinical and maternal covariate.

Unadjusted relative risk ratios are presented in Supplementary Tables 3 and 4.

**Table 2.** Maternal sociodemographic and clinical characteristics associated with non-invasive prenatal testing.

| **Prenatal screening type** | **NIPT** | | **Other prenatal aneuploidy screening¶** | | **aIRR (95% CI)** | |
| --- | --- | --- | --- | --- | --- | --- |
|  | **n** | **(row %)** | **n** | **(row %)** | **NIPT vs. Other** | |
| All participants | 53475 | (80.6) | 12868 | (19.4) |  |  |
|  |  |  |  |  |  |  |
| **Maternal age (years)** |  |  |  |  |  |  |
| <25 | 3496 | (66.3) | 1781 | (33.8) | 0.81 | (0.78-0.85) |
| 25-29 | 9942 | (77.4) | 2908 | (22.6) | 0.94 | (0.92-0.97) |
| 30-34 | 21677 | (81.3) | 4992 | (18.7) | Ref |  |
| 35-39 | 13797 | (85.1) | 2419 | (14.9) | 1.07 | (1.05-1.10) |
| ≥ 40 | 2990 | (86.4) | 472 | (13.6) | 1.11 | (1.07-1.16) |
| Missing | 1573 | (84.2) | 296 | (15.8) |  |  |
| **BMI categories** |  |  |  |  |  |  |
| <18 | 501 | (77.8) | 143 | (22.2) | 0.96 | (0.87-1.06) |
| 18-24 | 24575 | (82.5) | 5226 | (17.5) | Ref |  |
| 25-29 | 16104 | (80.6) | 3865 | (19.4) | 0.99 | (0.97-1.01) |
| 30-34 | 7060 | (78.8) | 1897 | (21.2) | 0.97 | (0.94-1.00) |
| 35-39 | 2919 | (76.0) | 922 | (24.0) | 0.94 | (0.90-0.98) |
| ≥ 40 | 1590 | (71.1) | 647 | (28.9) | 0.88 | (0.84-0.93) |
| missing | 726 | (81.2) | 168 | (18.8) |  |  |
| **Mothers' region of birth** |  |  |  |  |  |  |
| Americas | 662 | (84.9) | 118 | (15.1) | 0.95 | (0.88-1.03) |
| Australia | 28732 | (83.4) | 5740 | (16.7) | Ref |  |
| New Zealand | 767 | (68.7) | 350 | (31.3) | 0.85 | (0.78-0.92) |
| North Africa and the Middle East | 1327 | (68.9) | 600 | (31.1) | 0.87 | (0.82-0.92) |
| North-East Asia | 2125 | (89.7) | 243 | (10.3) | 1.01 | (0.96-1.05) |
| North-West Europe | 1453 | (87.4) | 210 | (12.6) | 0.99 | (0.93-1.05) |
| Oceania§ | 292 | (58.2) | 137 | (41.8) | 0.73 | (0.63-0.86) |
| South-East Asia | 4586 | (81.4) | 1047 | (18.6) | 0.96 | (0.93-0.99) |
| Southern and Central Asia | 10889 | (75.0) | 3625 | (25.0) | 0.88 | (0.86-0.91) |
| Southern and Eastern Europe | 980 | (86.3) | 156 | (13.7) | 1.03 | (0.96-1.11) |
| Sub-Saharan Africa | 770 | (63.1) | 451 | (36.9) | 0.77 | (0.71-0.84) |
| missing | 993 | (83.9) | 191 | (16.1) |  |  |
| **Socioeconomic status (IRSAD quintile)** |  |  |  |  |  |  |
| 1 (most disadvantaged) | 9696 | (75.3) | 3174 | (24.7) | Ref |  |
| 2 | 6440 | (79.7) | 1636 | (20.3) | 1.04 | (1.01-1.08) |
| 3 | 14737 | (77.8) | 4199 | (22.2) | 1.03 | (1.00-1.06) |
| 4 | 13936 | (83.4) | 2767 | (16.6) | 1.06 | (1.03-1.10) |
| 5 (most advantaged) | 8640 | (88.9) | 1080 | (11.1) | 1.09 | (1.06-1.13) |
| Missing | 26 | (68.4) | 12 | (31.6) |  |  |
| **Smoking status during pregnancy** |  |  |  |  |  |  |
| No | 52571 | (81.0) | 12360 | (19.0) | Ref |  |
| Yes | 904 | (64.0) | 508 | (36.0) | 0.82 | (0.77-0.89) |
| **COVID 19 status** |  |  |  |  |  |  |
| Unvaccinated | 5669 | (79.1) | 1502 | (21.0) | Ref |  |
| Vaccinated | 43984 | (80.9) | 10380 | (19.1) | 1.00 | (0.97-1.03) |
| Missing | 3822 | (79.5) | 986 | (20.5) |  |  |
| **Pertussis status** |  |  |  |  |  |  |
| Unvaccinated | 2797 | (73.3) | 1019 | (26.7) | Ref |  |
| Vaccinated | 49488 | (81.2) | 11483 | (18.8) | 1.03 | (0.99-1.08) |
| Missing | 1190 | (76.5) | 366 | (23.5) |  |  |
| **Parity**‡ |  |  |  |  |  |  |
| 0 | 25526 | (83.6) | 5019 | (16.4) | Ref |  |
| .1 | 20466 | (80.9) | 4831 | (19.1) | 0.94 | (0.92-0.96) |
| 2 | 5825 | (74.8) | 1963 | (25.2) | 0.86 | (0.84-0.89) |
| ≥ 3 | 1658 | (61.1) | 1055 | (38.9) | 0.73 | (0.69-0.77) |
| **Gestational age at first antenatal visit** |  |  |  |  |  |  |
| ≤ 12 weeks | 41819 | (80.4) | 10192 | (19.6) | Ref |  |
| > 12 weeks | 11656 | (81.3) | 2676 | (18.7) | 1.00 | (0.97-1.02) |
| **Care model** |  |  |  |  |  |  |
| Private in public hospital | 1236 | (94.5) | 72 | (5.5) | 1.11 | (1.04-1.19) |
| All other care models | 51954 | (80.3) | 12745 | (19.7) | Ref |  |
| Missing | 285 | (84.8) | 51 | (15.2) |  |  |

aIRR, adjusted incident rate ratio; BMI, Body Mass Index (kg/m2); IRSAD, Index of Relative Socioeconomic Advantage and Disadvantage.

‡Parity refers to the number of previous pregnancies resulting in a live birth or stillbirth at ≥ 20 weeks' gestation or with a birthweight of ≥ 400 g.

§Oceania excludes women born in Australia or New Zealand.

¶Other prenatal aneuploidy screening included combined first trimester screening, second trimester serum screening, and screening type not specified.

Row percentages are presented to reflect the distribution of prenatal screening type within each clinical and maternal covariate.

Unadjusted incident rate ratios are presented in Supplementary Table 5.
