# Supplementary material
Source: Research Square preprint supplement (doi:10.21203/rs.3.rs-9535071/v1)
Supplement: Supplementary file 2 [file d58d3cf51f30238f559976d2.docx]

**SUPPORTING INFORMATION**

**Supplementary Table 1.** Estimated number of births captured in this study based on the number of births in Victoria in 2021.

| **Category** | **n** | **(%)** |
| --- | --- | --- |
| Total births in Victoria in 20211 | 80322 | (100) |
| **By location** |  |  |
| Rural births | 18831 | (23.4) |
| Metropolitan births | 60030 | (74.7) |
| Outside Victorian or not adequately reported | 1461 | (1.8) |
| **By hospital** |  |  |
| Births at Royal Women’s Hospital2 | 8879 | (11.1) |
| **Births in this study in 2021** | 36,264 |  |
| Births in this study as % total births in Victoria | 36264/80322 | (45.1) |
| Births in this study as % metropolitan births (excluding Royal Women's hospital) | 36264/51151 | (70.9) |

References for Supplementary Table 1:

- 1. The Safer Care Victoria. (2021). Victoria’s Mothers, Babies and Children 2021: Report and presentations. State Government of Victoria. Retrieved from <https://www.safercare.vic.gov.au/publications/victorias-mothers-babies-and-children-2021-report-and-presentations>
  2. The Royal Women’s Hospital. (2021). 2021 Annual Report. Retrieved from <https://thewomens.r.worldssl.net/images/uploads/general-downloads/2904_RWH_A21_Annual_Report_FINAL.pdf>

**Supplementary Table 2.** Maternal sociodemographic and clinical characteristics associated with missing vs. non-missing prenatal aneuploidy screening data

| **Characteristic** | **Missing aneuploidy screening data** | | **Non-missing aneuploidy screening data** | | **Total** | | **P** |
| --- | --- | --- | --- | --- | --- | --- | --- |
|  | **n** | **(row %)** | **n** | **(row %)** | **n** | **(row %)** | **χ2** |
| All participants | 22374 | (21.8) | 80355 | (78.2) | 102729 | (100.0) |  |
| **Hospital name** |  |  |  |  |  |  |  |
| Other | 256 | (25.3) | 755 | (74.7) | 1011 | (1.0) | <0.001 |
| Angliss Hospital | 866 | (17.5) | 4082 | (82.5) | 4948 | (4.8) |  |
| Box Hill Hospital | 1644 | (22.4) | 5701 | (77.6) | 7345 | (7.1) |  |
| Casey Hospital | 1479 | (20.4) | 5757 | (77.6) | 7236 | (7.0) |  |
| Dandenong Hospital | 977 | (13.3) | 6368 | (79.6) | 7345 | (7.1) |  |
| Mercy Hospital for Women | 3520 | (22.7) | 11987 | (86.7) | 15507 | (15.1) |  |
| Monash Medical Centre | 3033 | (27.7) | 7932 | (77.3) | 10965 | (10.7) |  |
| Northern Hospital | 3646 | (46.8) | 4138 | (72.3) | 7784 | (7.6) |  |
| Peninsula Health | 2581 | (34.1) | 4982 | (53.2) | 7563 | (7.4) |  |
| Sandringham Hospital | 656 | (19.1) | 2772 | (65.9) | 3428 | (3.3) |  |
| Sunshine Hospital | 2115 | (10.8) | 17391 | (80.9) | 19506 | (19.0) |  |
| Werribee Mercy Hospital | 1601 | (15.9) | 8490 | (89.2) | 10091 | (9.8) |  |
| **Maternal age (years)** |  |  |  |  |  |  |  |
| 18 - 24 | 2904 | (26.1) | 8209 | (73.9) | 11113 | (10.8) | <0.001 |
| 25-29 | 4618 | (22.0) | 16383 | (78.0) | 21001 | (20.4) |  |
| 30-34 | 8125 | (20.7) | 31109 | (79.3) | 39234 | (38.2) |  |
| 35-39 | 4929 | (21.1) | 18476 | (78.9) | 23405 | (22.8) |  |
| ≥ 40 | 1223 | (23.4) | 4003 | (76.6) | 5226 | (5.1) |  |
| missing | 575 | (20.9) | 2175 | (79.1) | 2750 | (2.7) |  |
| **BMI categories** |  |  |  |  |  |  |  |
| <18 | 219 | (21.2) | 814 | (78.8) | 1033 | (1.0) | <0.001 |
| 18-24 | 8060 | (18.9) | 34672 | (81.1) | 42732 | (41.6) |  |
| 25-29 | 6111 | (20.3) | 24065 | (79.8) | 30176 | (29.4) |  |
| 30-34 | 3150 | (21.8) | 11310 | (78.2) | 14460 | (14.1) |  |
| 35-39 | 1521 | (23.2) | 5038 | (76.8) | 6559 | (6.4) |  |
| ≥ 40 | 1127 | (25.8) | 3250 | (74.3) | 4377 | (4.3) |  |
| missing | 2186 | (64.5) | 1206 | (35.6) | 3392 | (3.3) |  |
| **Mothers' region of birth** |  |  |  |  |  |  |  |
| Americas | 243 | (21.2) | 904 | (78.8) | 1147 | (1.1) | <0.001 |
| Australia | 12050 | (23.0) | 40377 | (77.0) | 52427 | (51.0) |  |
| New Zealand | 699 | (25.2) | 2079 | (74.8) | 2778 | (2.7) |  |
| North Africa and the Middle East | 1124 | (27.6) | 2954 | (72.4) | 4078 | (4.0) |  |
| North-East Asia | 559 | (18.3) | 2490 | (81.7) | 3049 | (3.0) |  |
| North-West Europe | 423 | (19.0) | 1809 | (81.1) | 2232 | (2.2) |  |
| Oceania§ | 312 | (29.0) | 764 | (71.0) | 1076 | (1.0) |  |
| South-East Asia | 1390 | (16.9) | 6817 | (83.1) | 8207 | (8.0) |  |
| Southern and Central Asia | 4185 | (19.5) | 17233 | (80.5) | 21418 | (20.8) |  |
| Southern and Eastern Europe | 331 | (20.5) | 1281 | (79.5) | 1612 | (1.6) |  |
| Sub-Saharan Africa | 645 | (22.6) | 2208 | (77.4) | 2853 | (2.8) |  |
| missing | 413 | (22.3) | 1439 | (77.7) | 1852 | (1.8) |  |
| **Socioeconomic status (IRSAD quintile)** |  |  |  |  |  |  |  |
| 1 (most disadvantaged) | 5472 | (24.0) | 17327 | (76.0) | 22829 | (22.2) | <0.001 |
| 2 | 2894 | (22.5) | 9952 | (77.5) | 12846 | (12.5) |  |
| 3 | 5876 | (20.0) | 23447 | (80.0) | 29323 | (28.5) |  |
| 4 | 5126 | (21.4) | 18844 | (78.6) | 23970 | (23.3) |  |
| 5 (most advantaged) | 2977 | (21.8) | 10702 | (78.2) | 13679 | (13.3) |  |
| missing | 29 | (35.4) | 53 | (64.6) | 82 | (0.1) |  |
| **Smoking status during pregnancy** |  |  |  |  |  |  |  |
| No | 21296 | (21.4) | 78093 | (78.6) | 99389 | (96.7) | <0.001 |
| Yes | 1078 | (32.3) | 2262 | (67.7) | 3340 | (3.3) |  |
| **COVID 19 status** |  |  |  |  |  |  |  |
| Unvaccinated | 2838 | (23.2) | 9410 | (76.8) | 12248 | (11.9) |  |
| Vaccinated | 17488 | (21.3) | 64620 | (78.7) | 82108 | (79.9) | <0.001 |
| missing | 2048 | (24.5) | 6325 | (75.5) | 8373 | (8.2) |  |
| **Pertussis status** |  |  |  |  |  |  |  |
| Unvaccinated | 3627 | (36.7) | 6257 | (63.3) | 9884 | (9.6) | <0.001 |
| Vaccinated | 17966 | (20.1) | 71557 | (79.9) | 89523 | (87.1) |  |
| missing | 781 | (23.5) | 2541 | (76.5) | 3322 | (3.2) |  |
| **Parity**‡ |  |  |  |  |  |  |  |
| 0 | 8743 | (20.1) | 34695 | (79.9) | 43438 | (42.3) | <0.001 |
| 1 | 7977 | (21.2) | 29735 | (78.9) | 37712 | (36.7) |  |
| 2 | 3469 | (24.7) | 10576 | (75.3) | 14045 | (13.7) |  |
| ≥ 3 | 2183 | (29.0) | 5349 | (71.0) | 7532 | (7.3) |  |
| missing | 2 | (100.0) | 0 | (0.0) | 2 | (0.0) |  |
| **Gestational age at first antenatal visit** |  |  |  |  |  |  |  |
| ≤12 weeks | 15990 | (20.4) | 62244 | (79.6) | 78234 | (76.2) | <0.001 |
| >12 weeks | 6384 | (26.1) | 18111 | (73.9) | 24495 | (23.8) |  |
| **Gestational age at birth (weeks)** |  |  |  |  |  |  |  |
| 20 - 27 | 404 | (40.2) | 600 | (59.8) | 1004 | (1.0) | <0.001 |
| 28 - 31 | 358 | (40.8) | 519 | (59.2) | 877 | (0.9) |  |
| 32 - 36 | 1714 | (28.3) | 4349 | (71.7) | 6063 | (5.9) |  |
| 37 - 41 | 19761 | (21.0) | 74455 | (79.0) | 94216 | (91.7) |  |
| ≥ 42 | 137 | (24.1) | 432 | (75.9) | 569 | (0.6) |  |
| **Infant sex** |  |  |  |  |  |  |  |
| Female | 10797 | (21.6) | 39164 | (78.4) | 49961 | (48.6) | 0.230 |
| Male | 11557 | (21.9) | 41167 | (78.1) | 52724 | (51.3) |  |
| missing | 20 | (45.5) | 24 | (54.6) | 44 | (0.0) |  |
| **Care model** |  |  |  |  |  |  |  |
| Private in public hospital | 1310 | (46.3) | 1522 | (53.7) | 2832 | (2.8) | <0.001 |
| All other care models | 20121 | (20.4) | 78370 | (79.6) | 98491 | (95.9) |  |
| Missing | 943 | (67.1) | 463 | (32.9) | 1406 | (1.4) |  |

BMI, Body Mass Index (kg/m2); IRSAD, Index of Relative Socioeconomic Advantage and Disadvantage.

§Oceania excluded women born in Australia or New Zealand.

‡Parity refers to the number of previous pregnancies resulting in a live birth or stillbirth at ≥ 20 weeks' gestation or with a birthweight of ≥ 400 g.

**Supplementary Table 3.** Maternal sociodemographic and clinical characteristics associated with prenatal aneuploidy screening status; unadjusted and adjusted relative risk ratios from complete case analysis (before multiple imputation).

| **Characteristic** | **Declined vs. accepted** | | | | **Not offered vs. accepted** | | | |
| --- | --- | --- | --- | --- | --- | --- | --- | --- |
|  | **uRRR** | **(95% CI)** | **aRRR** | **(95% CI)** | **uRRR** | **(95% CI)** | **aRRR** | **(95% CI)** |
| **Hospital name** |  |  |  |  |  |  |  |  |
| Other | 3.19 | (2.68 - 3.80) | 1.69 | (1.33 - 2.13) | 3.05 | (2.03 - 4.59) | 1.75 | (0.95 - 3.19) |
| Angliss Hospital | 0.93 | (0.83 - 1.05) | 0.69 | (0.83 - 1.11) | 0.52 | (0.36 - 0.76) | 0.85 | (0.55 - 1.30) |
| Box Hill Hospital | 0.77 | (0.69 - 0.86) | 0.90 | (0.79 - 1.04) | 0.77 | (0.58 - 1.02) | 1.06 | (0.74 - 1.51) |
| Casey Hospital | 1.45 | (1.13 - 1.59) | 1.23 | (1.09 - 1.40) | 0.78 | (0.59 - 1.04) | 0.88 | (0.60 - 1.29) |
| Dandenong Hospital | 2.25 | (2.06 - 2.45) | 1.56 | (1.40 - 1.75) | 1.88 | (1.51 - 2.33) | 2.17 | (1.63 - 2.89) |
| Mercy Hospital for Women | Ref |  | Ref |  | Ref |  | Ref |  |
| Monash Medical Centre | 1.65 | (1.15 - 1.79) | 1.27 | (1.13 - 1.42) | 1.34 | (1.08 - 1.67) | 1.58 | (1.19 - 2.11) |
| Northern Hospital | 2.73 | (2.50 - 2.01) | 1.36 | (1.20 - 1.54) | 1.96 | (1.53 - 2.50) | 1.60 | (1.16 - 2.20) |
| Peninsula Health | 0.90 | (0.80 - 1.00) | 0.86 | (0.75 - 0.99) | 0.94 | (0.71 - 1.23) | 1.59 | (1.15 - 2.21) |
| Sandringham Hospital | 0.59 | (0.50 - 0.69) | 1.02 | (0.83 - 1.26) | 0.36 | (0.21 - 0.60) | 1.00 | (0.54 - 1.85) |
| Sunshine Hospital | 2.40 | (2.24 - 2.57) | 1.52 | (1.39 - 1.67) | 1.32 | (1.09 - 1.58) | 1.11 | (0.88 - 1.42) |
| Werribee Mercy Hospital | 2.10 | (1.94 - 2.27) | 1.29 | (1.16 - 1.45) | 1.67 | (1.35 - 2.05) | 1.22 | (0.93 - 1.61) |
| **Maternal age (years)** |  |  |  |  |  |  |  |  |
| <25 | 3.23 | (3.05 - 3.42) | 4.19 | (3.89 - 4.52) | 4.40 | (3.80 - 5.10) | 4.58 | (3.80 - 5.51) |
| 25-29 | 1.65 | (1.56 - 1.73) | 1.89 | (1.77 - 2.01) | 1.70 | (1.46 - 1.97) | 1.70 | (1.42 - 2.02) |
| 30-34 | Ref | (0.00 - 0.00) | Ref | (0.00 - 0.00) | Ref | (0.00 - 0.00) | Ref | (0.00 - 0.00) |
| 35-39 | 0.83 | (0.78 - 0.87) | 0.64 | (0.60 - 0.69) | 0.95 | (0.80 - 1.11) | 0.68 | (0.56 - 0.83) |
| ≥ 40 | 0.91 | (0.82 - 1.00) | 0.51 | (0.45 - 0.58) | 1.26 | (0.97 - 1.65) | 0.73 | (0.54 - 1.00) |
| **BMI categories** |  |  |  |  |  |  |  |  |
| <18 | 1.60 | (1.34 - 1.91) | 1.24 | (0.99 - 1.56) | 1.81 | (1.09 - 3.01) | 1.74 | (1.03 - 2.93) |
| 18-24 | Ref |  | Ref |  | Ref |  | Ref |  |
| 25-29 | 1.22 | (1.17 - 1.29) | 1.04 | (0.98 - 1.10) | 1.55 | (1.36 - 1.78) | 1.41 | (1.21 - 1.66) |
| 30-34 | 1.58 | (1.50 - 1.68) | 1.21 | (1.12 - 1.30) | 1.88 | (1.59 - 2.21) | 1.60 | (1.32 - 1.93) |
| 35-39 | 1.87 | (1.74 - 2.02) | 1.29 | (1.17 - 1.42) | 2.28 | (1.85 - 2.80) | 1.69 | (1.32 - 2.17) |
| ≥ 40 | 2.76 | (2.54 - 3.00) | 1.70 | (1.52 - 1.90) | 2.84 | (2.24 - 3.59) | 2.14 | (1.61 - 2.85) |
| **Mothers' region of birth** |  |  |  |  |  |  |  |  |
| Americas | 0.91 | (0.74 - 1.11) | 1.57 | (1.23 - 2.00) | 1.14 | (0.66 - 1.94) | 2.43 | (1.34 - 4.38) |
| Australia | Ref |  | Ref |  | Ref |  | Ref |  |
| New Zealand | 4.99 | (4.55 - 5.49) | 2.97 | (2.63 - 3.35) | 5.32 | (4.24 - 6.68) | 3.22 | (2.43 - 4.26) |
| North Africa and the Middle East | 3.16 | (2.91 - 3.44) | 2.05 | (1.84 - 2.29) | 2.59 | (2.04 - 3.30) | 2.30 | (1.73 - 3.07) |
| North-East Asia | 0.27 | (0.22 - 0.33) | 0.53 | (0.42 - 0.67) | 0.59 | (0.38 - 0.90) | 1.64 | (1.04 - 2.59) |
| North-West Europe | 0.52 | (0.44 - 0.62) | 0.84 | (0.67 - 1.04) | 0.42 | (0.23 - 0.76) | 0.90 | (0.48 - 1.71) |
| Oceania§ | 7.63 | (6.57 - 8.86) | 4.12 | (3.40 – 4.95) | 9.06 | (6.60 – 12.45) | 5.53 | (3.80 – 8.06) |
| South-East Asia | 1.20 | (1.12 - 1.30) | 1.38 | (1.27 - 1.51) | 1.44 | (1.18 - 1.75) | 2.00 | (1.57 - 2.54) |
| Southern and Central Asia | 1.07 | (1.02 - 1.13) | 1.25 | (1.17 - 1.33) | 1.31 | (1.13 - 1.51) | 1.87 | (1.55 - 2.26) |
| Southern and Eastern Europe | 0.75 | (0.62 - 0.90) | 0.73 | (0.58 - 0.92) | 0.72 | (0.42 - 1.26) | 0.58 | (0.25 - 1.30) |
| Sub-Saharan Africa | 4.76 | (4.35 - 5.21) | 3.97 | (3.53 - 4.45) | 4.30 | (3.89 - 5.45) | 4.61 | (3.47 - 6.12) |
| **Socioeconomic status (IRSAD quintile)** |  |  |  |  |  |  |  |  |
| 1 (most disadvantaged) | Ref |  | Ref |  | Ref |  | Ref |  |
| 2 | 0.66 | (0.62 - 0.70) | 0.81 | (0.74 - 0.87) | 0.73 | (0.62 - 0.87) | 0.82 | (0.67 - 1.02) |
| 3 | 0.69 | (0.65 - 0.72) | 0.77 | (0.72 - 0.83) | 0.65 | (0.56 - 0.74) | 0.74 | (0.62 - 0.88) |
| 4 | 0.37 | (0.35 - 0.39) | 0.60 | (0.55 - 0.65) | 0.36 | (0.31 - 0.43) | 0.55 | (0.45 - 0.69) |
| 5 (most advantaged) | 0.29 | (0.27 - 0.31) | 0.59 | (0.53 - 0.66) | 0.30 | (0.24 - 0.37) | 0.52 | (0.38 - 0.70) |
| **Smoking status during pregnancy** |  |  |  |  |  |  |  |  |
| No | Ref |  | Ref |  | Ref |  | Ref |  |
| Yes | 2.81 | (2.56 - 3.08) | 1.71 | (1.52 - 1.93) | 4.50 | (3.71 - 5.45) | 3.02 | (2.36 - 3.85) |
| **COVID 19 status** |  |  |  |  |  |  |  |  |
| Unvaccinated | Ref |  | Ref |  | Ref |  | Ref |  |
| Vaccinated | 0.61 | (0.58 - 0.64) | 0.81 | (0.76 - 0.87) | 0.57 | (0.49 - 0.65) | 0.77 | (0.65 - 0.92) |
| **Pertussis status** |  |  |  |  |  |  |  |  |
| Unvaccinated | Ref |  | Ref |  | Ref |  | Ref |  |
| Vaccinated | 0.28 | (0.26 - 0.29) | 0.51 | (0.47 - 0.55) | 0.22 | (0.20 - 0.26) | 0.46 | (0.38 - 0.56) |
| **Parity**‡ |  |  |  |  |  |  |  |  |
| 0 | Ref |  | Ref |  | Ref |  | Ref |  |
| 1 | 1.34 | (1.28 - 1.41) | 1.82 | (1.71 - 1.93) | 0.96 | (0.84 - 1.09) | 1.22 | (1.05 - 1.43) |
| 2 | 2.81 | (2.66 - 2.97) | 3.85 | (3.58 - 4.14) | 1.44 | (1.22 - 1.70) | 1.73 | (1.40 - 2.12) |
| ≥ 3 | 7.49 | (7.02 - 7.99) | 8.69 | (7.94 - 9.50) | 4.87 | (4.15 - 5.71) | 4.54 | (3.64 - 5.66) |
| **Gestational age at first antenatal visit** |  |  |  |  |  |  |  |  |
| ≤ 12 weeks | Ref |  | Ref |  | Ref |  | Ref |  |
| > 12 weeks | 1.20 | (1.15 - 1.26) | 1.30 | (1.22 - 1.38) | 3.10 | (2.79 - 3.45) | 3.14 | (2.89 - 3.81) |
| **Gestational age at birth (weeks)** |  |  |  |  |  |  |  |  |
| 20 - 27 | 0.89 | (0.69 - 1.13) | 0.54 | (0.38 - 0.77) | 1.87 | (1.19 - 2.93) | 0.70 | (0.34 - 1.45) |
| 28 - 31 | 1.16 | (0.92 - 1.48) | 0.98 | (0.70 - 1.37) | 1.24 | (0.71 - 2.20) | 0.73 | (0.31 - 1.73) |
| 32 - 36 | Ref |  | Ref |  | Ref |  | Ref |  |
| 37 - 41 | 0.97 | (0.89 - 1.05) | 1.09 | (0.98 - 1.21) | 0.73 | (0.60 - 0.90) | 0.90 | (0.70 - 1.17) |
| ≥ 42 | 1.14 | (0.88 - 1.49) | 1.31 | (0.91 - 1.91) | 1.28 | (0.70 - 2.36) | 1.82 | (0.84 - 3.95) |
| **Infant Sex** |  |  |  |  |  |  |  |  |
| Female | Ref |  | Ref |  | Ref |  | Ref |  |
| Male | 0.96 | (0.92 - 1.00) | 0.92 | (0.88 - 0.97) | 0.99 | (0.89 - 1.10) | 0.94 | (0.82 - 1.06) |
| **Care model** |  |  |  |  |  |  |  |  |
| Private in public hospital | 0.34 | (0.27 - 0.42) | 0.37 | (0.29 - 0.50) | 0.69 | (0.44 - 1.07) | 0.36 | (0.16 - 0.82) |
| All other care models | Ref |  | Ref |  | Ref |  | Ref |  |

aRRR, adjusted relative risk ratio; BMI, Body Mass Index (kg/m2); IRSAD, Index of Relative Socioeconomic Advantage and Disadvantage; uRRR, unadjusted relative risk ratio.

‡Parity refers to the number of previous pregnancies resulting in a live birth or stillbirth at ≥20 weeks' gestation or with a birthweight or ≥400 g.

§Oceania excluded women born in Australia or New Zealand.

**Supplementary Table 4.** Maternal sociodemographic and clinical characteristics associated with prenatal aneuploidy screening status; unadjusted and adjusted relative risk ratios from multiple imputation.

| **Characteristic** | **Declined vs. accepted** | | | | **Not offered vs. accepted** | | | |
| --- | --- | --- | --- | --- | --- | --- | --- | --- |
|  | **uRRR** | **(95% CI)** | **aRRR** | **(95% CI)** | **uRRR** | **(95% CI)** | **aRRR** | **(95% CI)** |
| **Birth hospital** |  |  |  |  |  |  |  |  |
| Other | 3.20 | (3.00-3.42) | 1.44 | (1.33-1.56) | 3.11 | (2.70-3.58) | 1.55 | (1.31-1.83) |
| Angliss Hospital | 1.29 | (1.23-1.34) | 1.08 | (1.03-1.14) | 0.78 | (0.68-0.88) | 0.86 | (0.76-0.99) |
| Box Hill Hospital | 0.86 | (0.83-0.89) | 0.85 | (0.81-0.89) | 0.85 | (0.77-0.94) | 0.92 | (0.83-1.02) |
| Casey Hospital | 1.54 | (1.49-1.60) | 0.98 | (0.94-1.02) | 0.96 | (0.88-1.06) | 0.85 | (0.76-0.94) |
| Dandenong Hospital | 2.54 | (2.46-2.63) | 1.26 | (1.21-1.31) | 2.26 | (2.10-2.44) | 1.51 | (1.38-1.65) |
| Mercy Hospital for Women | Ref |  | Ref |  | Ref |  | Ref |  |
| Monash Medical Centre | 1.58 | (1.53-1.63) | 0.95 | (0.92-0.99) | 1.38 | (1.29-1.49) | 1.06 | (0.98-1.16) |
| Northern Hospital | 2.15 | (2.09-2.22) | 0.82 | (0.79-0.85) | 1.79 | (1.66-1.92) | 0.90 | (0.83-0.98) |
| Peninsula Health | 1.07 | (1.04-1.12) | 0.78 | (0.74-0.81) | 1.06 | (0.97-1.15) | 1.03 | (0.93-1.13) |
| Sandringham Hospital | 0.58 | (0.55-0.61) | 0.75 | (0.70-0.80) | 0.39 | (0.33-0.46) | 0.65 | (0.54-0.79) |
| Sunshine Hospital | 3.56 | (3.48-3.66) | 1.72 | (1.67-1.78) | 2.18 | (2.04-2.32) | 1.26 | (1.17-1.36) |
| Werribee Mercy Hospital | 2.47 | (2.40-2.55) | 1.44 | (1.38-1.49) | 2.12 | (1.98-2.28) | 1.36 | (1.24-1.47) |
| **Maternal age (years)** |  |  |  |  |  |  |  |  |
| <25 | 2.90 | (2.84-2.97) | 3.86 | (3.75-3.96) | 3.96 | (3.77-4.16) | 4.30 | (4.06-4.56) |
| 25-29 | 1.62 | (1.58-1.64) | 1.83 | (1.79-1.87) | 1.67 | (1.59-1.76) | 1.74 | (1.66-1.84) |
| 30-34 | Ref |  | Ref |  | Ref |  | Ref |  |
| 35-39 | 0.82 | (0.80-0.84) | 0.66 | (0.64-0.68) | 0.93 | (0.88-0.98) | 0.78 | (0.73-0.82) |
| ≥ 40 | 0.82 | (0.79-0.85) | 0.51 | (0.48-0.53) | 1.21 | (1.11-1.32) | 0.77 | (0.70-0.84) |
| **BMI categories** |  |  |  |  |  |  |  |  |
| <18 | 1.37 | (1.28-1.47) | 1.11 | (1.02-1.20) | 1.54 | (1.30-1.83) | 1.20 | (1.01-1.44) |
| 18-24 | Ref |  | Ref |  | Ref |  | Ref |  |
| 25-29 | 1.23 | (1.21-1.25) | 1.06 | (1.03-1.07) | 1.59 | (1.52-1.66) | 1.47 | (1.40-1.54) |
| 30-34 | 1.58 | (1.55-1.61) | 1.17 | (1.15-1.20) | 1.89 | (1.80-2.00) | 1.60 | (1.51-1.69) |
| 35-39 | 1.85 | (1.80-1.90) | 1.26 | (1.22-1.30) | 2.29 | (2.14-2.45) | 1.77 | (1.65-1.91) |
| ≥ 40 | 2.66 | (2.58-2.75) | 1.62 | (1.55-1.68) | 2.89 | (2.68-3.12) | 2.17 | (1.99-2.36) |
| **Mothers' region of birth** |  |  |  |  |  |  |  |  |
| Americas | 0.89 | (0.83-0.96) | 1.53 | (1.41-1.66) | 1.29 | (1.09-1.53) | 2.36 | (1.97-2.83) |
| Australia | Ref |  | Ref |  | Ref |  | Ref |  |
| New Zealand | 5.13 | (4.93-5.33) | 2.96 | (2.82-3.10) | 5.64 | (5.22-6.09) | 3.24 | (2.97-3.53) |
| North Africa and the Middle East | 2.79 | (2.70-2.88) | 1.94 | (1.87-2.01) | 2.36 | (2.18-2.55) | 1.96 | (1.80-2.14) |
| North-East Asia | 0.28 | (2.65-0.31) | 0.58 | (0.53-0.63) | 0.62 | (0.53-0.71) | 1.54 | (1.33-1.80) |
| North-West Europe | 0.52 | (0.49-0.55) | 0.86 | (0.80-0.92) | 0.42 | (0.34-0.51) | 0.79 | (0.65-0.97) |
| Oceania§ | 5.96 | (5.62-6.32) | 3.14 | (2.93-3.36) | 6.89 | (6.19-7.68) | 3.50 | (3.19-4.06) |
| South-East Asia | 1.37 | (1.32-1.40) | 1.50 | (1.45-1.55) | 1.63 | (1.52-1.74) | 2.21 | (2.04-2.38) |
| Southern and Central Asia | 1.10 | (1.08-1.12) | 1.23 | (1.19-1.25) | 1.36 | (1.30-1.42) | 1.85 | (1.76-1.97) |
| Southern and Eastern Europe | 0.62 | (0.58-0.67) | 0.70 | (0.65-0.75) | 0.65 | (0.54-0.78) | 0.76 | (0.62-0.93) |
| Sub-Saharan Africa | 4.54 | (4.37-4.71) | 3.63 | (3.48-2.80) | 4.16 | (3.83-4.50) | 3.97 | (3.63-4.35) |
| **Socioeconomic status (IRSAD quintile)** |  |  |  |  |  |  |  |  |
| 1 (most disadvantaged) | Ref |  | Ref |  | Ref |  | Ref |  |
| 2 | 0.67 | (0.65-0.68) | 0.76 | (0.74-0.78) | 0.73 | (0.69-0.68) | 0.88 | (0.78-0.89) |
| 3 | 0.72 | (0.70-0.73) | 0.77 | (0.75-0.78) | 0.66 | (0.63-0.73) | 0.72 | (0.68-0.76) |
| 4 | 0.37 | (0.36-0.38) | 0.59 | (0.57-0.60) | 0.35 | (0.33-0.38) | 0.56 | (0.52-0.60) |
| 5 (most advantaged) | 0.27 | (0.26-0.28) | 0.59 | (0.57-0.61) | 0.27 | (0.25-0.28) | 0.56 | (0.51-0.61) |
| **Smoking status during pregnancy** |  |  |  |  |  |  |  |  |
| No | Ref |  | Ref |  | Ref |  | Ref |  |
| Yes | 2.03 | (1.97-2.10) | 1.22 | (1.18-1.27) | 2.87 | (2.69-3.07) | 1.86 | (1.72-2.00) |
| **COVID 19 status** |  |  |  |  |  |  |  |  |
| Unvaccinated | Ref |  | Ref |  | Ref |  | Ref |  |
| Vaccinated | 0.63 | (0.62-0.65) | 0.81 | (0.79-0.82) | 0.59 | (0.56-0.61) | 0.76 | (0.72-0.80) |
| **Pertussis status** |  |  |  |  |  |  |  |  |
| Unvaccinated | Ref |  | Ref |  | Ref |  | Ref |  |
| Vaccinated | 0.37 | (0.36-0.38) | 0.58 | (0.56-0.59) | 0.30 | (0.29-0.31) | 0.54 | (0.51-0.58) |
| **Parity**‡ |  |  |  |  |  |  |  |  |
| 0 | Ref |  | Ref |  | Ref |  | Ref |  |
| 1 | 1.34 | (1.32-1.36) | 1.68 | (1.64-1.71) | 0.95 | (0.91-0.99) | 1.17 | (1.11-1.23) |
| 2 | 2.65 | (2.60-2.71) | 3.43 | (3.34-3.52) | 1.30 | (1.23-1.38) | 1.56 | (1.46-1.65) |
| ≥ 3 | 6.32 | (6.16-6.49) | 7.17 | (6.94-7.39) | 4.17 | (3.95-4.39) | 3.93 | (3.68-4.19) |
| **Gestational age at first antenatal visit** |  |  |  |  |  |  |  |  |
| ≤ 12 weeks | Ref |  | Ref |  | Ref |  | Ref |  |
| > 12 weeks | 1.07 | (1.05-1.08) | 1.01 | (0.99-1.03) | 2.25 | (2.17-2.33) | 2.18 | (2.09-2.28) |
| **Gestational age at birth (weeks)** |  |  |  |  |  |  |  |  |
| 20 - 27 | 0.81 | (0.76-0.87) | 0.60 | (0.55-0.65) | 1.30 | (1.13-1.50) | 0.86 | (0.73-1.01) |
| 28 - 31 | 0.86 | (0.80-0.93) | 0.77 | (0.70-0.84) | 0.84 | (0.70-1.01) | 0.68 | (0.56-0.83) |
| 32 - 36 | Ref |  | Ref |  | Ref |  | Ref |  |
| 37 - 41 | 1.05 | (1.02-1.08) | 1.11 | (1.07-1.16) | 0.85 | (0.80-0.91) | 1.05 | (0.97-1.13) |
| ≥ 42 | 1.02 | (0.92-1.12) | 1.26 | (1.21-1.42) | 1.21 | (0.98-1.49) | 0.61 | (1.28-2.02) |
| **Infant sex** |  |  |  |  |  |  |  |  |
| Female | Ref |  | Ref |  | Ref |  | Ref |  |
| Male | 0.96 | (0.94-0.97) | 0.94 | (0.93-0.96) | 0.99 | (0.95-1.02) | 0.96 | (0.92-0.99) |
| **Care model** |  |  |  |  |  |  |  |  |
| Private in public hospital | 2.50 | (0.24-0.27) | 0.49 | (0.46-0.53) | 0.41 | (0.36-0.47) | 0.65 | (0.57-0.76) |
| All other care models | Ref |  | Ref |  | Ref |  | Ref |  |

aRRR, adjusted relative risk ratio; BMI, Body Mass Index (kg/m2); IRSAD, Index of Relative Socioeconomic Advantage and Disadvantage; uRRR, unadjusted relative risk ratio.

‡Parity refers to the number of previous pregnancies resulting in a live birth or stillbirth at ≥20 weeks' gestation or with a birthweight or ≥400 g.

§Oceania excluded women born in Australia or New Zealand.

**Supplementary Table 5.** Maternal sociodemographic and clinical characteristics associated with non-invasive prenatal testing; unadjusted and adjusted incident rate ratios.

| **Characteristic** | **Other prenatal screening type**¶ **vs. NIPT** | | | |
| --- | --- | --- | --- | --- |
|  | **uIRR** | **(95% CI)** | **aIRR** | **(95% CI)** |
| **Hospital name** |  |  |  |  |
| Other | 0.94 | (0.85-1.04) | 0.98 | (0.88-1.09) |
| Angliss Hospital | 0.90 | (0.87-0.94) | 0.91 | (0.87-0.95) |
| Box Hill Hospital | 0.96 | (0.92-0.99) | 0.94 | (0.90-0.98) |
| Casey Hospital | 0.89 | (0.86-0.93) | 0.94 | (0.90-0.98) |
| Dandenong Hospital | 0.87 | (0.84-0.90) | 0.94 | (0.89-0.98) |
| Mercy Hospital for Women | Ref | (0.00-0.00) | Ref | (0.00-0.00) |
| Monash Medical Centre | 0.92 | (0.89-0.96) | 0.94 | (0.91-0.98) |
| Northern Hospital | 0.82 | (0.79-0.86) | 0.91 | (0.86-0.96) |
| Peninsula Health | 1.02 | (0.98-1.06) | 1.03 | (0.99-1.07) |
| Sandringham Hospital | 1.05 | (1.00-1.10) | 0.98 | (0.93-1.03) |
| Sunshine Hospital | 0.90 | (0.88-0.93) | 0.96 | (0.93-0.99) |
| Werribee Mercy Hospital | 0.87 | (0.84-0.90) | 0.94 | (0.90-0.98) |
| **Maternal age (years)** |  |  |  |  |
| <25 | 0.82 | (0.79-0.84) | 0.81 | (0.78-0.85) |
| 25-29 | 0.95 | (0.93-0.97) | 0.94 | (0.92-0.97) |
| 30-34 | Ref |  | Ref | (0.00-0.00) |
| 35-39 | 1.05 | (1.02-1.07) | 1.07 | (1.05-1.10) |
| ≥ 40 | 1.06 | (1.02-1.10) | 1.11 | (1.07-1.16) |
| **BMI categories** |  |  |  |  |
| <18 | 0.94 | (0.86-1.03) | 0.96 | (0.87-1.06) |
| 18-24 | Ref |  | Ref | (0.00-0.00) |
| 25-29 | 0.98 | (0.96-1.00) | 0.99 | (0.97-1.01) |
| 30-34 | 0.96 | (0.93-0.98) | 0.97 | (0.94-1.00) |
| 35-39 | 0.92 | (0.89-0.96) | 0.94 | (0.90-0.98) |
| ≥ 40 | 0.86 | (0.82-0.91) | 0.88 | (0.84-0.93) |
| **Mothers' region of birth** |  |  |  |  |
| Americas | 1.02 | (0.94-1.10) | 0.95 | (0.88-1.03) |
| Australia | Ref |  | Ref | (0.00-0.00) |
| New Zealand | 0.82 | (0.77-0.89) | 0.85 | (0.78-0.92) |
| North Africa and the Middle East | 0.83 | (0.78-0.87) | 0.87 | (0.82-0.92) |
| North-East Asia | 1.07 | (1.03-1.12) | 1.01 | (0.96-1.05) |
| North-West Europe | 1.04 | (0.99-1.11) | 0.99 | (0.93-1.05) |
| Oceania§ | 0.69 | (0.61-0.81) | 0.73 | (0.63-0.86) |
| South-East Asia | 0.98 | (0.95-1.01) | 0.96 | (0.93-0.99) |
| Southern and Central Asia | 0.90 | (0.88-0.92) | 0.88 | (0.86-0.91) |
| Southern and Eastern Europe | 1.04 | (0.97-1.10) | 1.03 | (0.96-1.11) |
| Sub-Saharan Africa | 0.76 | (0.70-0.81) | 0.77 | (0.71-0.84) |
| **Socioeconomic status (IRSAD quintile)** |  |  |  |  |
| 1 (most disadvantaged) | Ref |  | Ref |  |
| 2 | 1.05 | (1.03-1.09) | 1.04 | (1.01-1.08) |
| 3 | 1.03 | (1.01-1.06) | 1.03 | (1.00-1.06) |
| 4 | 1.10 | (1.08-1.13) | 1.06 | (1.03-1.10) |
| 5 (most advantaged) | 1.17 | (1.14-1.21) | 1.09 | (1.06-1.13) |
| **Smoking status during pregnancy** |  |  |  |  |
| No | Ref |  | Ref |  |
| Yes | 0.79 | (0.74-0.84) | 0.82 | (0.77-0.89) |
| **COVID 19 status** |  |  |  |  |
| Unvaccinated | Ref |  | Ref |  |
| Vaccinated | 1.02 | (1.00-1.05) | 1.00 | (0.97-1.03) |
| **Pertussis status** |  |  |  |  |
| Unvaccinated | Ref |  | Ref |  |
| Vaccinated | 1.11 | (1.07-1.15) | 1.03 | (0.99-1.08) |
| **Parity**‡ |  |  |  |  |
| 0 | Ref |  | Ref |  |
| 1 | 0.97 | (0.95-0.99) | 0.94 | (0.92-0.96) |
| 2 | 0.90 | (0.87-0.92) | 0.86 | (0.84-0.89) |
| ≥ 3 | 0.73 | (0.70-0.77) | 0.73 | (0.69-0.77) |
| **Gestational age at first antenatal visit** |  |  |  |  |
| ≤ 12 weeks | Ref |  | Ref |  |
| > 12 weeks | 1.01 | (0.99-1.03) | 1.00 | (0.97-1.02) |
| **Gestational age at birth (weeks)** |  |  |  |  |
| 20 - 27 | 1.02 | (0.92-1.14) | 1.04 | (0.91-1.18) |
| 28 - 31 | 0.95 | (0.85-1.07) | 0.97 | (0.85-1.11) |
| 32 - 36 | Ref |  | Ref | (0.00-0.00) |
| 37 - 41 | 0.98 | (0.95-1.02) | 0.98 | (0.94-1.02) |
| ≥ 42 | 0.99 | (0.88-1.12) | 0.96 | (0.84-1.10) |
| **Infant sex** |  |  |  |  |
| Girl | Ref |  | Ref |  |
| Boy | 1.00 | (0.98-1.02) | 1.00 | (0.98-1.02) |
| **Care model** |  |  |  |  |
| Private in Public hospital | 1.17 | (1.11-1.24) | 1.11 | (1.04-1.19) |
| All other care models | Ref |  | Ref |  |

aIRR, adjusted incident rate ratio; BMI, Body Mass Index (kg/m2); IRSAD, Index of Relative Socioeconomic Advantage and Disadvantage; uIRR, unadjusted incident rate ratio.

‡Parity refers to the number of previous pregnancies resulting in a live birth or stillbirth at ≥ 20 weeks' gestation or with a birthweight of ≥ 400 g.

§Oceania excludes women born in Australia or New Zealand.

¶Other prenatal aneuploidy screening included combined first trimester screening, second trimester serum screening, and screening type not specified.

**Supplementary Table 6.** Maternal birth hospital, gestational age at birth, and infant sex associated with prenatal aneuploidy screening status.

| **Characteristic** | **Declined screening** | | **Not offered screening** | | **Accepted screening** | | **aRRR (95% CI)** | | | |
| --- | --- | --- | --- | --- | --- | --- | --- | --- | --- | --- |
|  | **n** | **(row %)** | **n** | **(row %)** | **n** | **(row %)** | **Declined  vs. accepted** | | **Not offered vs. accepted** | |
| All participants | 12632 | (15.7) | 1380 | (1.7) | 66343 | (82.6) |  |  |  |  |
| **Birth hospital** |  |  |  |  |  |  |  |  |  |  |
| Other | 197 | (26.1) | 28 | (3.7) | 530 | (70.2) | 1.44 | (1.33-1.56) | 1.55 | (1.31-1.83) |
| Angliss Hospital | 396 | (9.7) | 33 | (0.8) | 3653 | (89.5) | 1.08 | (1.03-1.14) | 0.86 | (0.76-0.99) |
| Box Hill Hospital | 463 | (8.1) | 69 | (1.2) | 5169 | (90.7) | 0.85 | (0.81-0.89) | 0.92 | (0.83-1.02) |
| Casey Hospital | 822 | (14.3) | 66 | (1.2) | 4869 | (84.6) | 0.98 | (0.94-1.02) | 0.85 | (0.76-0.94) |
| Dandenong Hospital | 1291 | (20.3) | 160 | (2.5) | 4917 | (77.2) | 1.26 | (1.21-1.31) | 1.51 | (1.38-1.65) |
| Mercy Hospital for Women | 1232 | (10.3) | 183 | (1.5) | 10572 | (88.2) | Ref |  | Ref |  |
| Monash Medical Centre | 1253 | (15.8) | 152 | (1.9) | 6527 | (82.3) | 0.95 | (0.92-0.99) | 1.06 | (0.98-1.16) |
| Northern Hospital | 976 | (23.6) | 104 | (2.5) | 3058 | (73.9) | 0.82 | (0.79-0.85) | 0.90 | (0.83-0.98) |
| Peninsula Health | 464 | (9.3) | 72 | (0.1) | 4446 | (89.2) | 0.78 | (0.74-0.81) | 1.03 | (0.93-1.13) |
| Sandringham Hospital | 177 | (6.4) | 16 | (0.6) | 2579 | (93.0) | 0.75 | (0.70-0.80) | 0.65 | (0.54-0.79) |
| Sunshine Hospital | 3732 | (21.5) | 304 | (1.8) | 13355 | (76.8) | 1.72 | (1.67-1.78) | 1.26 | (1.17-1.36) |
| Werribee Mercy Hospital | 1629 | (19.2) | 193 | (2.3) | 6668 | (78.5) | 1.44 | (1.38-1.49) | 1.36 | (1.24-1.47) |
| **Gestational age at birth (weeks)** |  |  |  |  |  |  |  |  |  |  |
| 20 - 27 | 85 | (14.2) | 25 | (4.2) | 490 | (81.7) | 0.60 | (0.55-0.65) | 0.86 | (0.73-1.01) |
| 28 - 31 | 94 | (18.1) | 14 | (2.7) | 411 | (79.2) | 0.77 | (0.70-0.84) | 0.68 | (0.56-0.83) |
| 32 - 36 | 696 | (16.0) | 97 | (2.2) | 3556 | (81.8) | Ref |  | Ref |  |
| 37 - 41 | 11680 | (15.7) | 1232 | (1.7) | 61543 | (82.7) | 1.11 | (1.07-1.16) | 1.05 | (0.97-1.13) |
| ≥ 42 | 77 | (17.8) | 12 | (2.8) | 343 | (79.4) | 1.26 | (1.21-1.42) | 1.61 | (1.28-2.02) |
| **Infant sex** |  |  |  |  |  |  |  |  |  |  |
| Female | 6273 | (16.0) | 675 | (1.7) | 32240 | (82.3) | Ref |  | Ref |  |
| Male | 6359 | (15.5) | 705 | (1.7) | 34103 | (82.8) | 0.94 | (0.93-0.96) | 0.96 | (0.92-0.99) |

aRRR, adjusted relative risk ratio; BMI, body mass index (kg/m2); CI, confidence interval; IRSAD, Index of Relative Socioeconomic Advantage and Disadvantage.

**Supplementary Table 7.** Maternal birth hospital, gestational age at birth, and infant associated with non-invasive prenatal testing.

| **Prenatal screening type** | **NIPT** | | **Other prenatal aneuploidy screening¶** | | **aIRR (95% CI)** | |
| --- | --- | --- | --- | --- | --- | --- |
|  | **n** | **(row %)** | **n** | **(row %)** | **NIPT vs. Other** | |
| All participants | 53475 | (80.6) | 12868 | (19.4) |  |  |
|  |  |  |  |  |  |  |
| **Hospital name (row%)** |  |  |  |  |  |  |
| Other | 433 | (81.7) | 97 | (18.3) | 0.98 | (0.88-1.09) |
| Angliss Hospital | 2866 | (78.5) | 787 | (21.5) | 0.91 | (0.87-0.95) |
| Box Hill Hospital | 4302 | (83.2) | 867 | (16.8) | 0.94 | (0.90-0.98) |
| Casey Hospital | 3772 | (77.5) | 1097 | (22.5) | 0.94 | (0.90-0.98) |
| Dandenong Hospital | 3714 | (75.5) | 1203 | (24.5) | 0.94 | (0.89-0.98) |
| Mercy Hospital for Women | 9175 | (86.8) | 1397 | (13.2) | Ref | (0.00-0.00) |
| Monash Medical Centre | 5239 | (80.3) | 1288 | (19.7) | 0.94 | (0.91-0.98) |
| Northern Hospital | 1286 | (71.5) | 782 | (28.5) | 0.91 | (0.86-0.96) |
| Peninsula Health | 3944 | (88.7) | 502 | (11.3) | 1.03 | (0.99-1.07) |
| Sandringham Hospital | 2352 | (91.2) | 227 | (8.8) | 0.98 | (0.93-1.03) |
| Sunshine Hospital | 10455 | (78.5) | 2900 | (21.7) | 0.96 | (0.93-0.99) |
| Werribee Mercy Hospital | 5037 | (75.5) | 1631 | (24.5) | 0.94 | (0.90-0.98) |
| Missing | 26 | (68.4) | 12 | (31.6) |  |  |
| **Gestational age at birth (weeks)** |  |  |  |  |  |  |
| 20 - 27 | 411 | (83.9) | 79 | (16.1) | 1.04 | (0.91-1.18) |
| 28 - 31 | 321 | (78.1) | 90 | (21.9) | 0.97 | (0.85-1.11) |
| 32 - 36 | 2911 | (81.9) | 645 | (18.1) | Ref | (0.00-0.00) |
| 37 - 41 | 49553 | (80.5) | 11990 | (19.5) | 0.98 | (0.94-1.02) |
| ≥ 42 | 279 | (81.3) | 64 | (18.7) | 0.96 | (0.84-1.10) |
| **Infant sex** |  |  |  |  |  |  |
| Girl | 25965 | (80.6) | 6275 | (19.5) | Ref |  |
| Boy | 27510 | (80.7) | 6593 | (19.3) | 1.00 | (0.98-1.02) |

aIRR, adjusted incident rate ratio; BMI, Body Mass Index (kg/m2); IRSAD, Index of Relative Socioeconomic Advantage and Disadvantage.

¶Other prenatal aneuploidy screening included combined first trimester screening, second trimester serum screening, and screening type not specified.
